# Supplementary material for: The frequency of POLE-mutation in endometrial carcinoma and prognostic implications: a systemic review and meta-analysis
Source: PubMed Central journal article supplement — J Pathol Transl Med. 2020 Sep 2;54(6):471–9. doi: 10.4132/jptm.2020.07.23 (PMC7674757; doi:10.4132/jptm.2020.07.23), 2020-09-02
Supplement: jptm-2020-07-23-suppl7.pdf [file jptm-2020-07-23-suppl7.pdf]

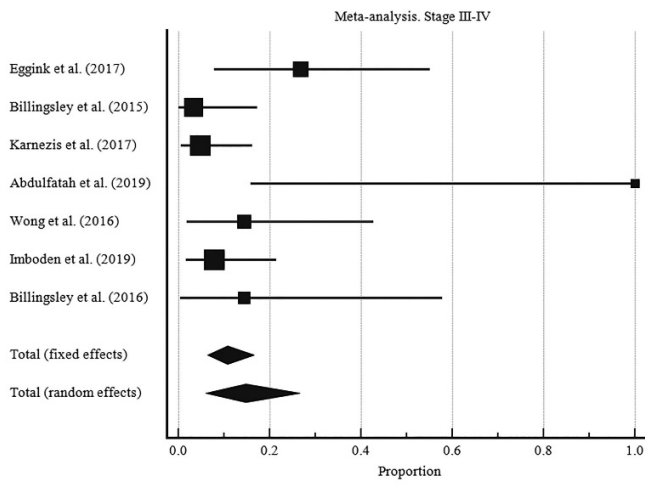

**Supplementary Fig. S9.** FIGO stage III-IV analysis in *POLE*-mutant endometrial carcinoma [2,3,5,6,8,13,16].

FIGO, International Federation of Gynecology and Obstetrics; *POLE*, DNA polymerase epsilon.

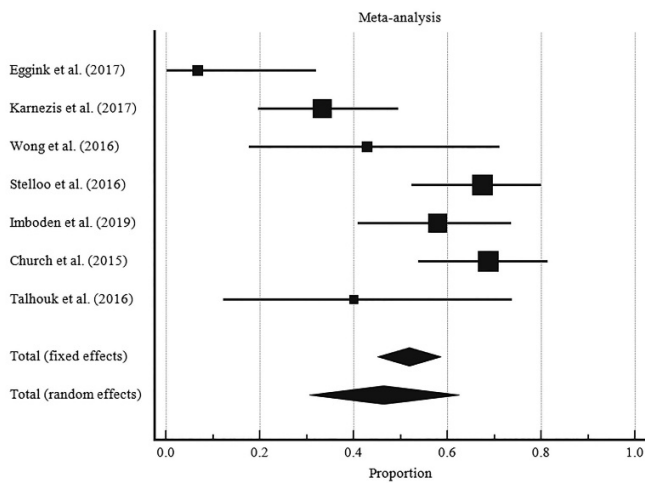

**Supplementary Fig. S10.** Grade I-II analysis in *POLE*-mutant endometrial carcinoma [2,3,6-10]. *POLE*, DNA polymerase epsilon.
