# Supplementary material for: The frequency of POLE-mutation in endometrial carcinoma and prognostic implications: a systemic review and meta-analysis
Source: PubMed Central journal article supplement — J Pathol Transl Med. 2020 Sep 2;54(6):471–9. doi: 10.4132/jptm.2020.07.23 (PMC7674757; doi:10.4132/jptm.2020.07.23), 2020-09-02
Supplement: jptm-2020-07-23-suppl9.pdf [file jptm-2020-07-23-suppl9.pdf]

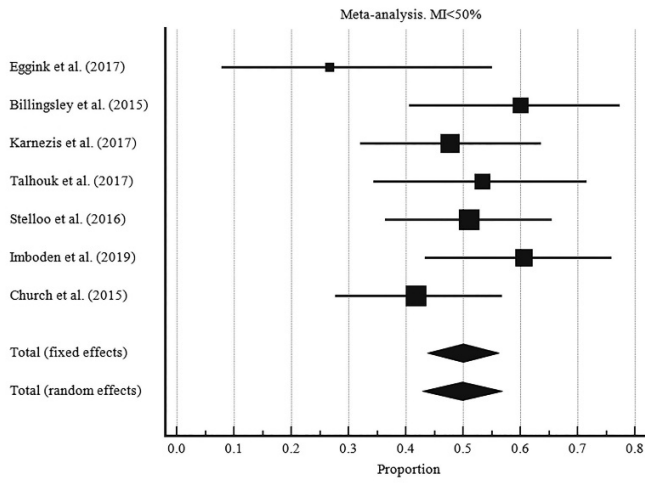

**Supplementary Fig. S13.** Myometrial invasion <50% analysis in *POLE*-mutant endometrial carcinoma [2-4,7-9,13].

*POLE*, DNA polymerase epsilon.

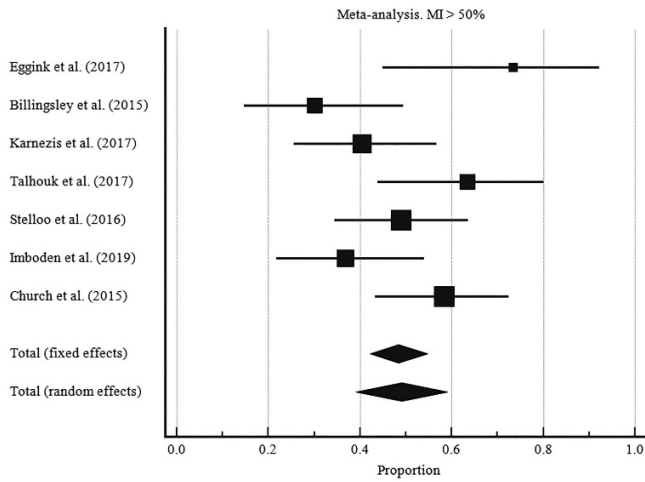

**Supplementary Fig. S14.** Myometrial invasion >50% analysis in *POLE*-mutant endometrial carcinoma [2-4,7-9,13].

*POLE*, DNA polymerase epsilon.
