# Supplementary material for: The frequency of POLE-mutation in endometrial carcinoma and prognostic implications: a systemic review and meta-analysis
Source: PubMed Central journal article supplement — J Pathol Transl Med. 2020 Sep 2;54(6):471–9. doi: 10.4132/jptm.2020.07.23 (PMC7674757; doi:10.4132/jptm.2020.07.23), 2020-09-02
Supplement: jptm-2020-07-23-suppl10.pdf [file jptm-2020-07-23-suppl10.pdf]

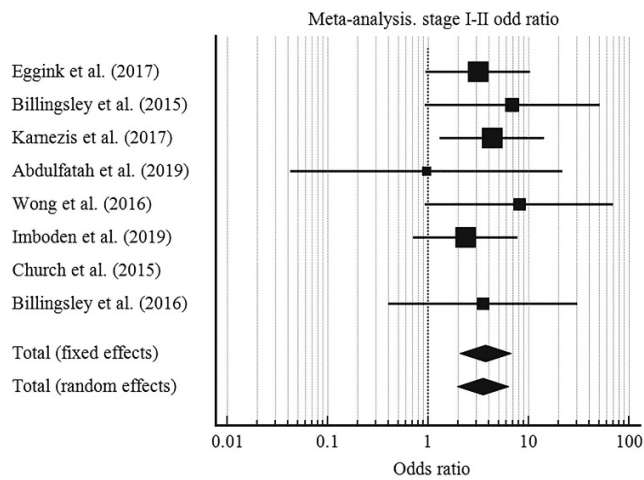

**Supplementary Fig. S15.** Pooled odd ratio of stage I-II in *POLE* mutant EC vs. stage I-II in non-*POLE* mutant EC analysis [2,3,5,6,8,9,13,16]. *POLE*, DNA polymerase epsilon; EC, endometrial carcinoma.

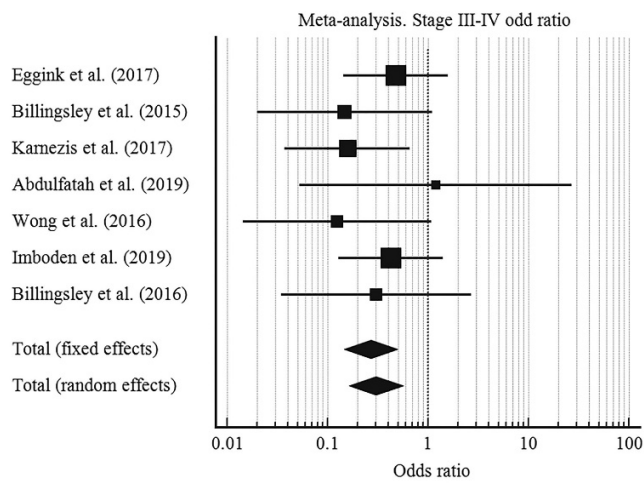

**Supplementary Fig. S16.** Pooled odd ratio of stage III-IV in *POLE* mutant EC vs. stage III-IV in non-*POLE* mutant EC analysis [2,3,5,6,8,13,16]. *POLE*, DNA polymerase epsilon; EC, endometrial carcinoma.
