# Supplementary material for: The frequency of POLE-mutation in endometrial carcinoma and prognostic implications: a systemic review and meta-analysis
Source: PubMed Central journal article supplement — J Pathol Transl Med. 2020 Sep 2;54(6):471–9. doi: 10.4132/jptm.2020.07.23 (PMC7674757; doi:10.4132/jptm.2020.07.23), 2020-09-02
Supplement: jptm-2020-07-23-suppl11.pdf [file jptm-2020-07-23-suppl11.pdf]

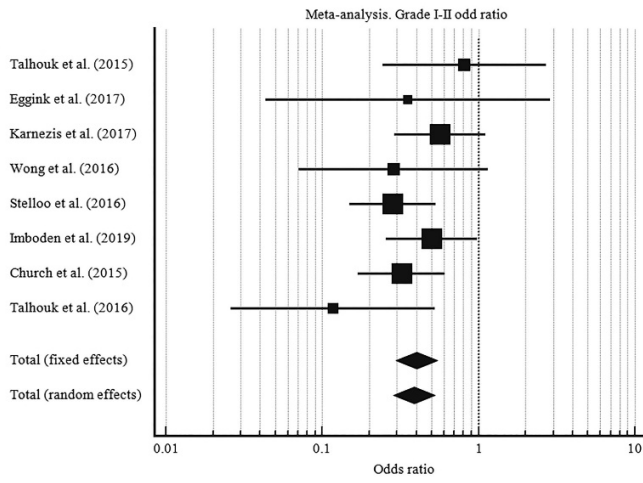

**Supplementary Fig. S17.** Pooled odd ratio of grade I-II in *POLE* mutant EC vs. grade I-II in non-*POLE* mutant EC analysis [1-3,6-10]. *POLE*, DNA polymerase epsilon; EC, endometrial carcinoma.

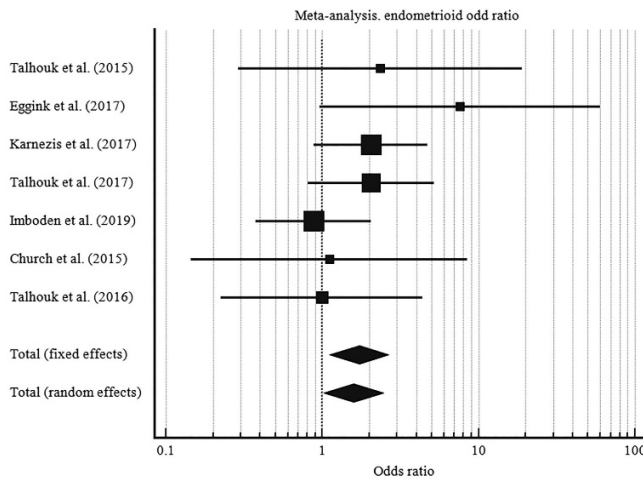

**Supplementary Fig. S18.** Pooled odd ratio of endometrioid (type I) in *POLE* mutant EC vs. endometrioid (type I) in non-*POLE* mutant EC analysis [1-4,8-10]. *POLE*, DNA polymerase epsilon; EC, endometrial carcinoma.
